# Supplementary material
Source: Research Square preprint supplement (doi:10.21203/rs.3.rs-9611211/v1)

Graphical abstract


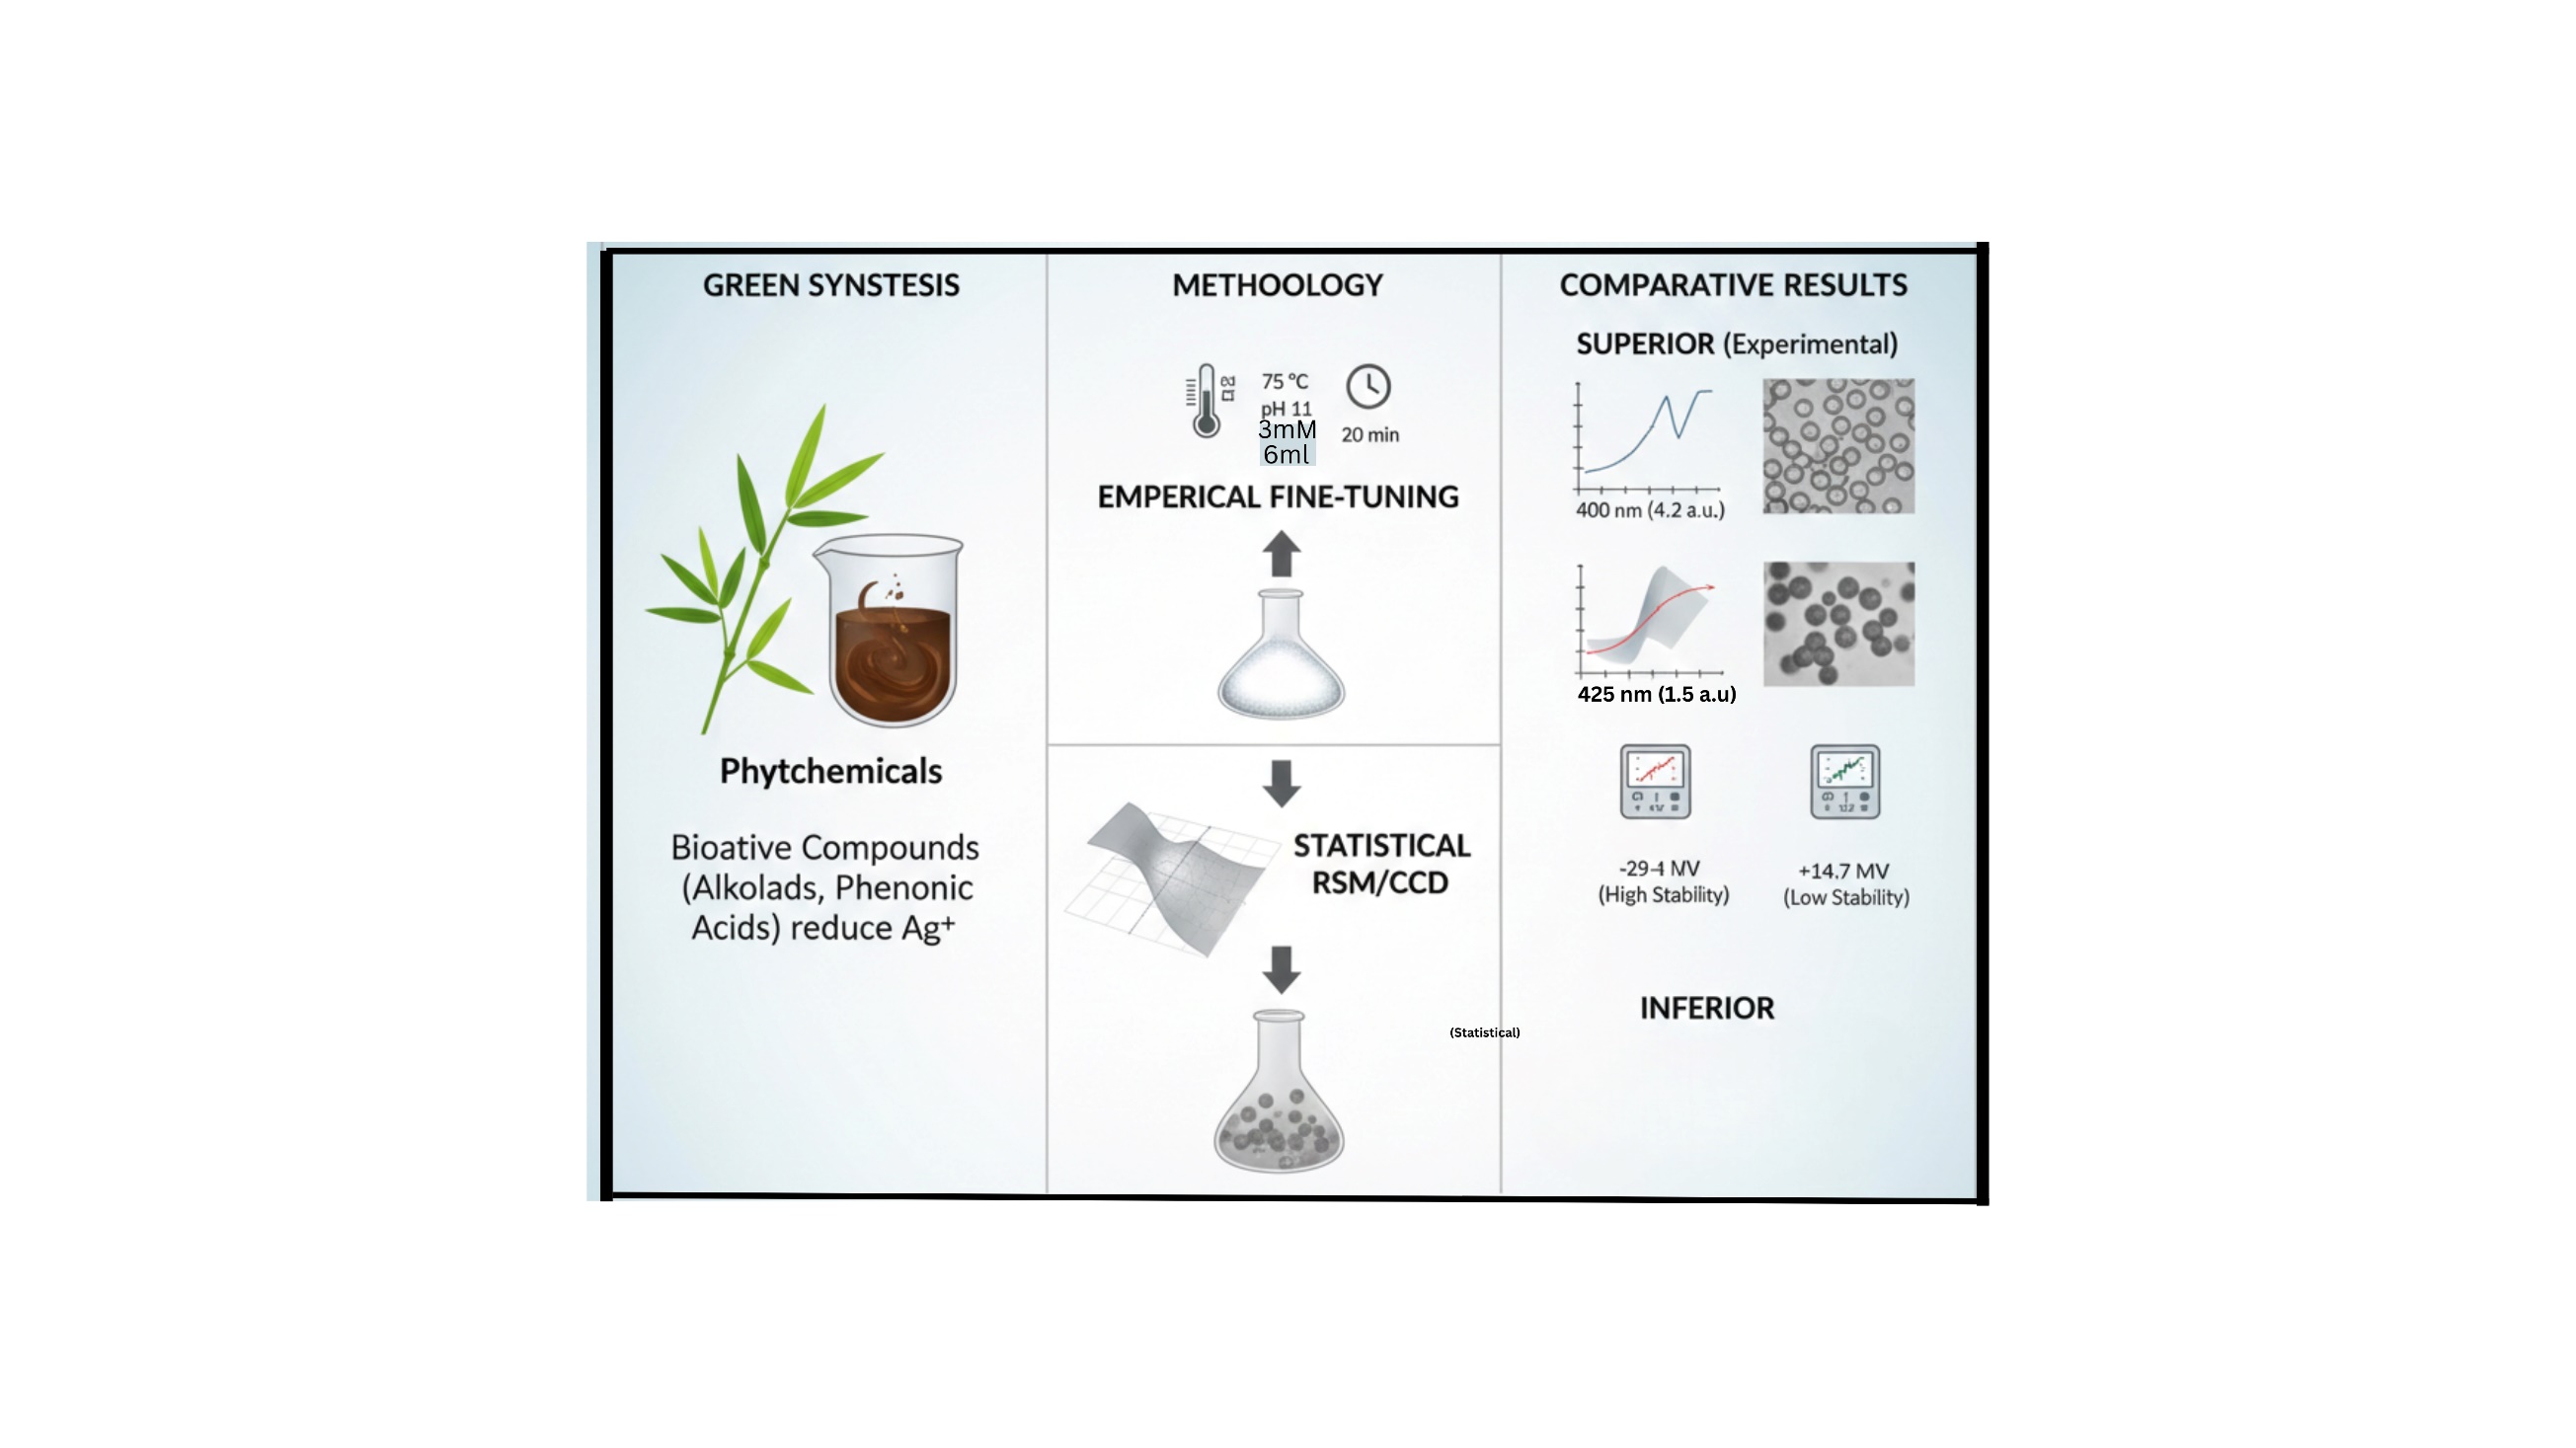

Supplement: Supplementary file 1 [file e5dfeee6076622a81f8ad965.docx]
